# Supplementary material
Source: Springer Nature journal article supplement (https://www.springermedizin.de/resource/supplementary/12974_2011_438_MOESM10_ESM.pdf/9601288)

(A) Control

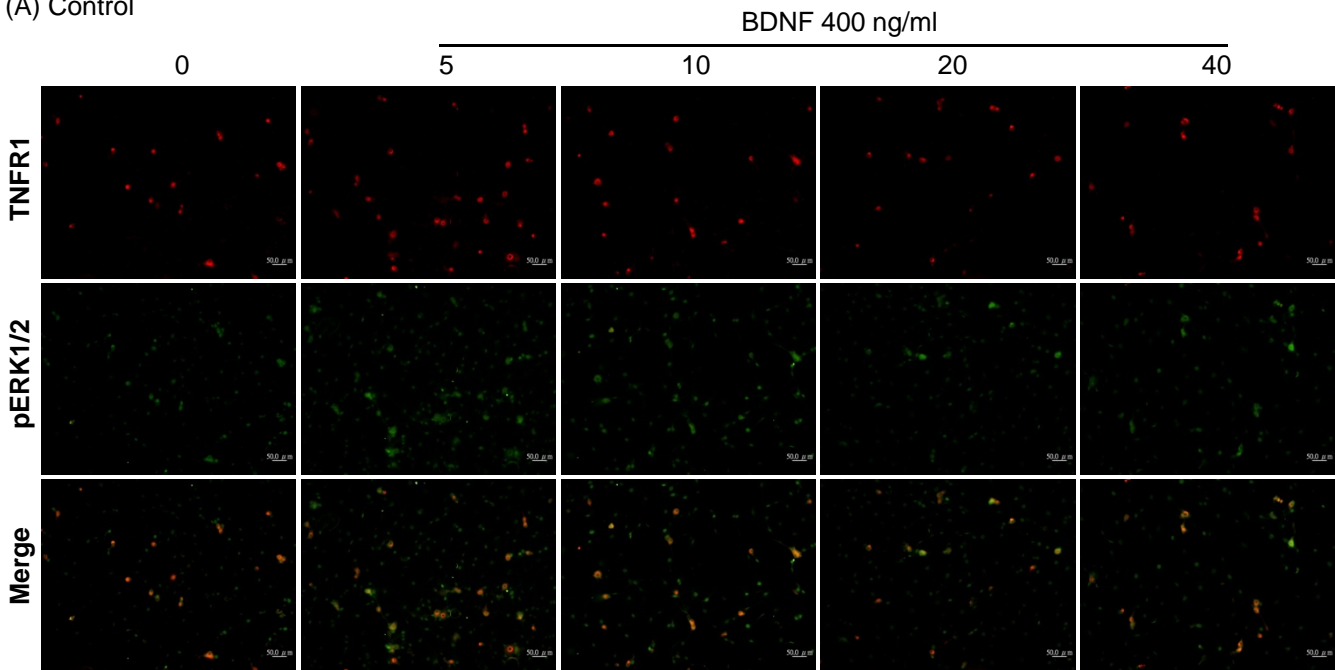

(B) TNF- $\alpha$

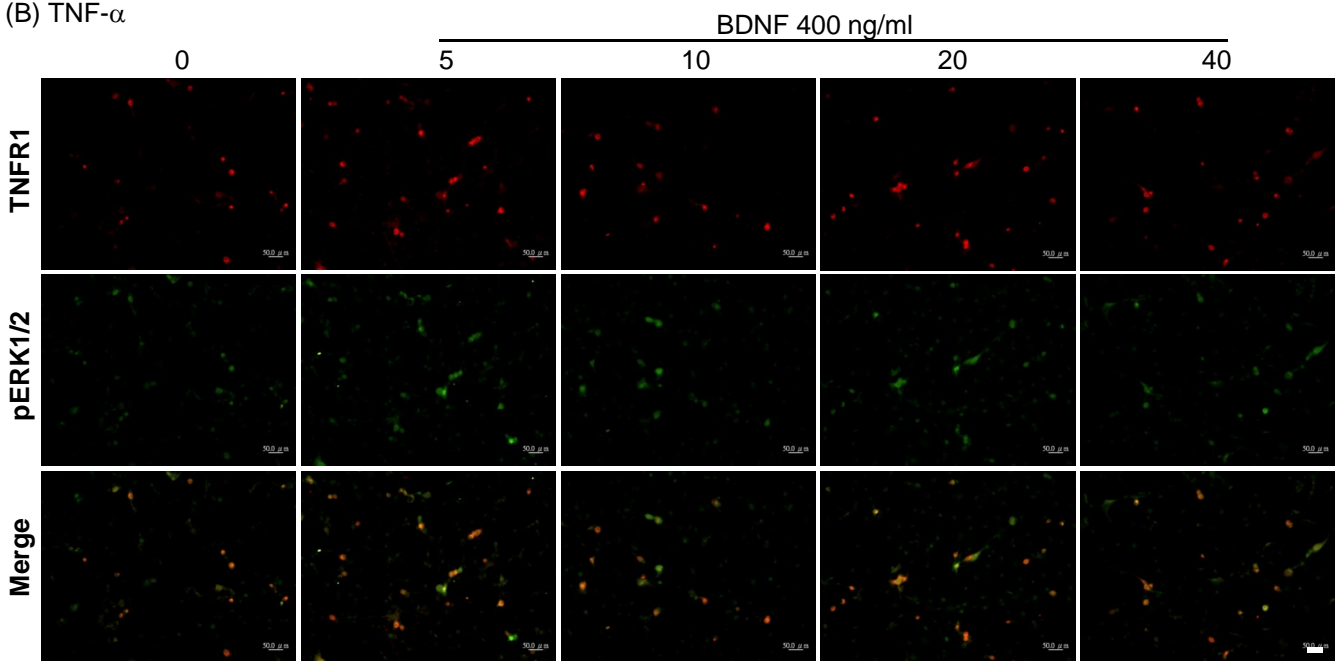

Supplement: MOESM10 [file 9601288]
